# Supplementary material
Source: PubMed Central journal article supplement (PMC8218591)
Supplement: NIHMS1713796-supplement-1.pdf [file NIHMS1713796-supplement-1.pdf]

**Supplementary Table 1: Medications with Cognitive Side Effects Consumed by U.S. Adults Aged 60+ in NHANES from 1999-2000 to 2015-2016**

|                                                  |                                     |                 |
|--------------------------------------------------|-------------------------------------|-----------------|
| Acamprosate                                      | Fluorouracil                        | Pantoprazole    |
| Alprazolam                                       | Fluoxetine                          | Phenobarbital   |
| Amitriptyline                                    | Olanzapine/Fluoxetine Hydrochloride | Phenytoin       |
| Amitriptyline Hydrochloride/Perphenazine         | Fluvastatin                         | Pitavastatin    |
| Atorvastatin                                     | Gabapentin                          | Pramipexole     |
| Baclofen                                         | Heparin                             | Pravastatin     |
| Bendroflumethiazide/Nadolol                      | Hydrochlorothiazide/Propranolol     | Prednisolone    |
| Benzotropine                                     | Ibuprofen                           | Pregabalin      |
| Carbidopa                                        | Interferon Alfa-2A                  | Progesterone    |
| Carbidopa/Levodopa                               | Isoniazid                           | Promethazine    |
| Ciprofloxacin                                    | Ketoprofen                          | Propafenone     |
| Clomipramine                                     | Lamotrigine                         | Propranolol     |
| Clonazepam                                       | Leuprolide                          | Pyridoxine      |
| Conjugated Estrogens                             | Levetiracetam                       | Quinidine       |
| Cyclopentolate                                   | Levofloxacin                        | Rabeprazole     |
| Cyclophosphamide                                 | Lorazepam                           | Ramelteon       |
| Cyclosporine                                     | Lovastatin                          | Ribavirin       |
| Cyproheptadine                                   | Meclizine                           | Rivastigmine    |
| Dexlansoprazole                                  | Mefloquine                          | Rosuvastatin    |
| Diazepam                                         | Methocarbamol                       | Scopolamine     |
| Diltiazem                                        | Methotrexate                        | Simvastatin     |
| Dorzolamide                                      | Methyldopa                          | Tamsulosin      |
| Dronabinol                                       | Montelukast                         | Temazepam       |
| Enzalutamide                                     | Moxifloxacin                        | Testosterone    |
| Esomeprazole                                     | Naproxen                            | Tolterodine     |
| Estazolam                                        | Niacin/Simvastatin                  | Topiramate      |
| Esterified Estrogens                             | Nifedipine                          | Trazodone       |
| Estradiol                                        | Nortriptyline                       | Tretinoin       |
| Estradiol/Norethindrone                          | Ofloxacin                           | Triazolam       |
| Estradiol/Norgestimate                           | Olanzapine                          | Trihexyphenidyl |
| Conjugated Estrogens/Medroxyprogesterone Acetate | Omeprazole                          | Valproic Acid   |
| Estrogens/Methyltestosterone                     | Omeprazole/Sodium Bicarbonate       | Zaleplon        |
| Estropipate                                      | Oxcarbazepine                       | Zolmitriptan    |
| Etidronate                                       | Oxybutynin                          | Zolpidem        |

**Supplementary Table 2: Top 25 Medications with the Largest Change in Utilization Among U.S. Adults Aged 60+ from 1999-2000 to 2015-2016. Data Source: NHANES 1999-2000 to 2015-2016.**

| Medications          | Weighted Prevalence of Utilization Among U.S. Adults Aged 60+ (%) |         |         |         |         |         |         |         |         | Difference<br>Between 2015-<br>16 and 1999-00<br>(%) | P-value<br>for<br>Trend |
|----------------------|-------------------------------------------------------------------|---------|---------|---------|---------|---------|---------|---------|---------|------------------------------------------------------|-------------------------|
|                      | 1999-00                                                           | 2001-02 | 2003-04 | 2005-06 | 2007-08 | 2009-10 | 2011-12 | 2013-14 | 2015-16 |                                                      |                         |
| Simvastatin          | 5.81                                                              | 7.19    | 8.09    | 10.74   | 13.45   | 18.94   | 18.68   | 14.97   | 14.35   | 8.54                                                 | p<0.001                 |
| Atorvastatin         | 7.36                                                              | 10.67   | 13.38   | 16.06   | 14.44   | 9.40    | 9.63    | 15.05   | 14.99   | 7.63                                                 | p<0.001                 |
| Conjugated estrogens | 7.08                                                              | 10.35   | 3.18    | 1.60    | 2.12    | 1.33    | 1.07    | 0.83    | 0.60    | -6.48                                                | p<0.001                 |
| Omeprazole           | 4.48                                                              | 4.47    | 2.44    | 4.34    | 7.23    | 9.29    | 9.95    | 12.44   | 10.43   | 5.94                                                 | p<0.001                 |
| Pravastatin          | 2.45                                                              | 2.56    | 3.46    | 1.60    | 2.46    | 2.74    | 4.82    | 5.60    | 7.12    | 4.67                                                 | p<0.001                 |
| Rosuvastatin         | 0.00                                                              | 0.00    | 0.51    | 0.87    | 2.47    | 3.24    | 3.37    | 6.77    | 4.54    | 4.54                                                 | p<0.001                 |
| Gabapentin           | 0.55                                                              | 1.98    | 2.18    | 1.84    | 2.79    | 3.12    | 3.60    | 4.67    | 4.34    | 3.79                                                 | p<0.001                 |
| Tamsulosin           | 0.76                                                              | 1.24    | 2.54    | 2.61    | 2.56    | 3.03    | 3.53    | 4.34    | 4.43    | 3.67                                                 | p<0.001                 |
| Esomeprazole         | 0.00                                                              | 0.00    | 3.56    | 4.53    | 4.75    | 3.96    | 2.81    | 2.94    | 3.28    | 3.28                                                 | p=0.111                 |
| Nifedipine           | 3.38                                                              | 2.52    | 2.22    | 1.90    | 1.27    | 1.86    | 1.18    | 0.85    | 0.83    | -2.55                                                | p<0.001                 |
| Pantoprazole         | 0.05                                                              | 1.32    | 2.96    | 2.25    | 2.04    | 2.02    | 1.60    | 3.69    | 2.58    | 2.53                                                 | p<0.001                 |
| Montelukast          | 0.44                                                              | 0.94    | 1.57    | 1.50    | 1.90    | 2.43    | 1.27    | 1.91    | 2.97    | 2.53                                                 | p<0.01                  |
| Lovastatin           | 0.98                                                              | 1.60    | 1.73    | 3.60    | 3.16    | 4.04    | 3.25    | 3.15    | 2.90    | 1.92                                                 | p<0.001                 |
| Propranolol          | 2.30                                                              | 1.17    | 1.57    | 2.19    | 1.45    | 0.62    | 1.03    | 0.78    | 0.43    | -1.86                                                | p<0.01                  |
| Diltiazem            | 3.89                                                              | 4.78    | 4.23    | 3.92    | 2.86    | 2.13    | 1.77    | 1.95    | 2.07    | -1.82                                                | p<0.001                 |
| Pregabalin           | 0.00                                                              | 0.00    | 0.00    | 0.16    | 0.27    | 1.11    | 0.34    | 0.99    | 1.70    | 1.70                                                 | p<0.001                 |
| Zolpidem             | 1.01                                                              | 0.74    | 1.65    | 1.84    | 1.65    | 1.88    | 1.39    | 3.02    | 2.47    | 1.47                                                 | p<0.01                  |
| Fluoxetine           | 0.86                                                              | 1.31    | 1.20    | 1.34    | 2.01    | 1.69    | 0.81    | 2.70    | 2.29    | 1.44                                                 | p<0.01                  |
| Meclizine            | 1.87                                                              | 1.34    | 1.28    | 0.53    | 1.11    | 0.76    | 0.88    | 0.63    | 0.44    | -1.43                                                | p=0.056                 |
| Fluvastatin          | 1.33                                                              | 1.04    | 1.04    | 0.96    | 0.41    | 0.02    | 0.00    | 0.00    | 0.00    | -1.33                                                | p<0.01                  |
| Alprazolam           | 1.63                                                              | 1.34    | 2.36    | 2.08    | 2.63    | 1.02    | 1.88    | 3.30    | 2.89    | 1.26                                                 | p<0.05                  |
| Cyclosporine         | 0.00                                                              | 0.25    | 0.05    | 0.36    | 0.21    | 0.44    | 0.28    | 0.72    | 1.23    | 1.23                                                 | p<0.05                  |
| Clonazepam           | 0.30                                                              | 0.57    | 0.63    | 0.42    | 0.81    | 1.06    | 1.78    | 0.77    | 1.44    | 1.14                                                 | p<0.01                  |
| Naproxen             | 1.96                                                              | 1.47    | 1.54    | 1.55    | 1.70    | 1.15    | 1.68    | 1.41    | 0.92    | -1.04                                                | p=0.833                 |
| Baclofen             | 0.02                                                              | 0.00    | 0.10    | 0.12    | 0.10    | 0.48    | 0.24    | 0.35    | 0.90    | 0.87                                                 | p<0.01                  |

Notes: P-value is obtained from logistic regression.
